# Supplementary material for: Atomistic modelling insight into the structure of lignite-based activated carbon and benzene sorption behavior
Source: Royal Society of Chemistry journal article supplement (doi:10.1039/c6ra07533a), 2016-01-01
Supplement: c6ra07533a1.pdf [file c6ra07533a1.pdf]

## Supplementary data

### 1. Image analysis of high resolution transmission electron micrographs (HRTEM)

A semi-automated procedure in Adobe Photoshop coupled with Matlab was applied to extract parameters regarding fringe width, orientation angles and centroid coordinates from HRTEM images. This processing procedure derived from Enette <sup>1</sup>, includes following steps of (1)contrast enhancement, (2)histogram equalization, (3)Gaussian blur, (4)fast Fourier transform filtering, (5)band-pass filtering, (6)smooth filtering, (7)inverse Fourier transform filtering, (8)binary image conversion, and (9)skeletonization, as shown in Figure 1. Finally, fringes smaller than 3Å were rejected, since they could be considered as noise and removed without loss of data <sup>2-5</sup>.

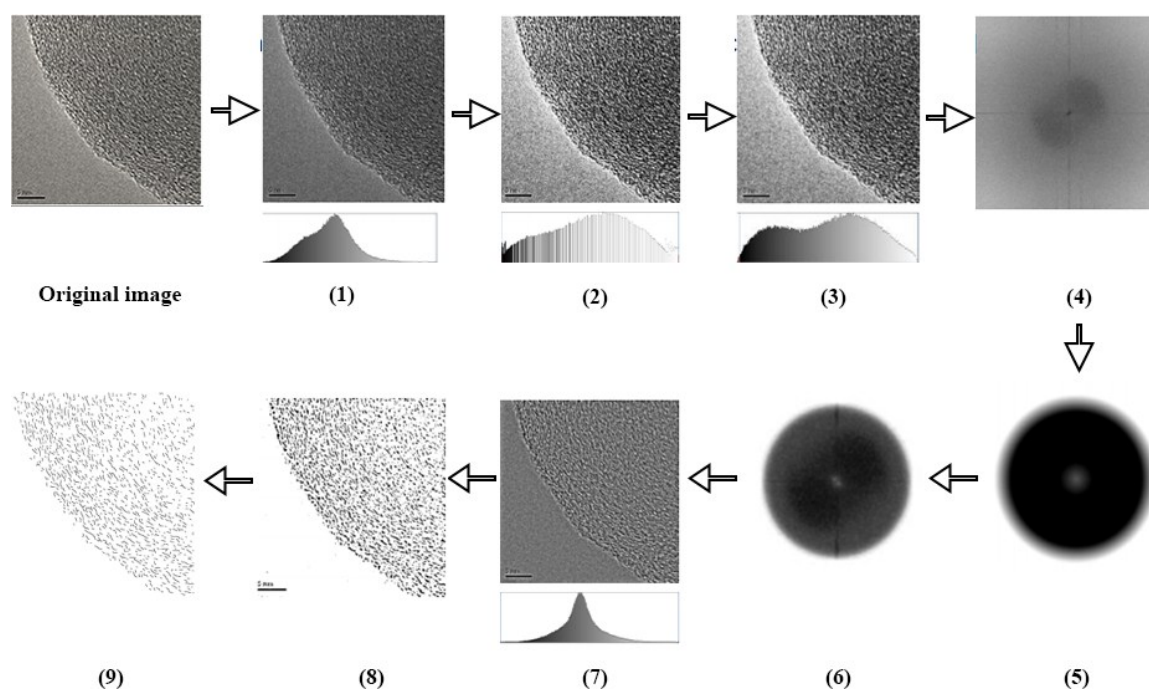

Fig.1 The processing procedure of HRTEM image analysis

The extract parameters, including skeleton length, centroid coordinates and moment angle are interpreted in Matlab, where a graphical user interface (GUI) are developed to identify stack distributions <sup>1</sup>. Herein, the authors set the parameter of midpoint distance (7.0Å), perpendicular distance (4.0Å) and angle difference (30°), as demonstrates in Figure 2. The program compared the information of one fringe relative to all other fringes, and if all three of these conditions were met, fringe characterizations were identified as part of a multiple fringe stack. A final check was conducted to ensure no fringe formed a part of more than one recognized stack.

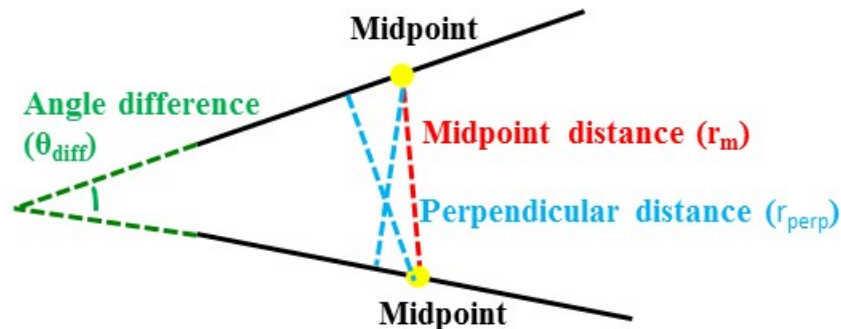

Fig.2 Illustration of distance between fringe midpoints and perpendicular distances between two fringes

## 2. Experimental characterization of lignite-based activated carbon

The lignite-based activated carbon used in this research originated from Norit Americas Inc, identified as SuperDarco. Prior to tests, the samples were crushed and sieved to 200×400 US mesh size. Experimental characterization included mercury porosimetry, helium pycnometry, elemental analysis, pore size distribution and Brunauer-Emmett-Teller surface area. Testing methods and results were shown in Table1.

**Table 1 Analytical Characterization of lignite-feed activated carbon identified as “SuperDarco”**

| Characterization                           | Experimental Values   | Instruments and/or methods                      |
|--------------------------------------------|-----------------------|-------------------------------------------------|
| <b>Pore volume distribution (Nitrogen)</b> |                       | ASAP 2020                                       |
| Micropores (< 20Å)                         | 0.252 mL/g            | (Micromeritics, USA)                            |
| Mesopores (20~310Å)                        | 0.506 mL/g            |                                                 |
| Large Mesopores (310~500Å)                 | 0.041 mL/g            |                                                 |
| <b>Surface area</b>                        | 879 m <sup>2</sup> /g | Brunauer-Emmett-Teller method                   |
| <b>Apparent density</b>                    | 0.33 g/ml             | Packed-bed dry density                          |
| <b>Mercury porosimetry</b>                 |                       | Autopore IV                                     |
| 2,000,000~490,000Å                         | 0.120 mL/g            | (Micromeritics, USA)                            |
| 490,000~310Å                               | 1.848 mL/g            |                                                 |
| 310~36Å                                    | 0.489 mL/g            |                                                 |
| <b>Helium pycnometry</b>                   | 2.20 g/mL             | AccuPyc 1330 Pycnometer<br>(Micromeritics, USA) |
| <b>Ash content</b>                         | 16.93%                | ASTM Designation: D3174 – 12                    |

| Elemental composition, atomic % |        | 2400 Series II CHNS/O System |
|---------------------------------|--------|------------------------------|
| Carbon                          | 68.52% | (PerkinElmer, USA)           |
| Hydrogen                        | 12.04% |                              |
| Oxygen                          | 19.16% |                              |
| Nitrogen                        | 0.28%  |                              |

The adsorption isotherm of nitrogen at 77K exhibited a combination of Type I and IV profile according to IUPAC classification was shown in Figure 3. A sharp uptake at low relative pressure indicated a microporous structure. The initial part of the curve was attributed to monolayer-multilayer adsorption, whereas the hysteresis loop was associated with capillary condensation taking place in the mesopores <sup>6</sup>. The lower end of the hysteresis loop approximately occurred at  $p/p_0=0.4$ , indicating that the capillary condensation might start from a pore size at about 30Å <sup>7</sup>.

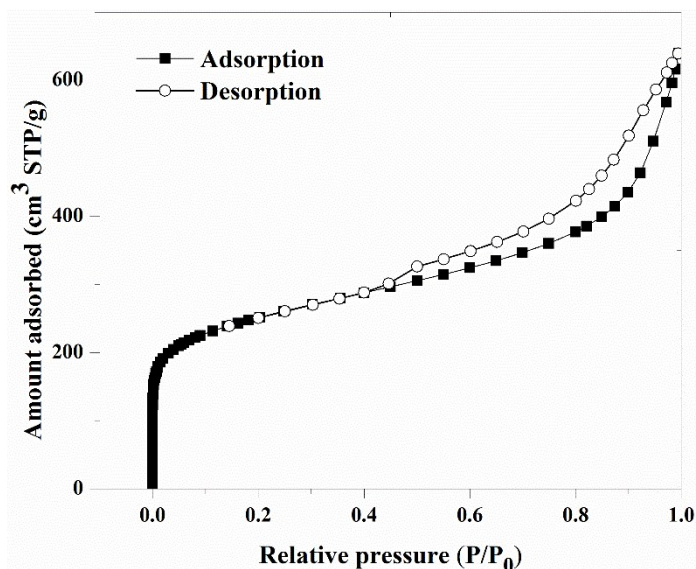

Fig.3 Adsorption and desorption isotherm of nitrogen at 77K

## 2. Cross-linked clusters in the simulated models

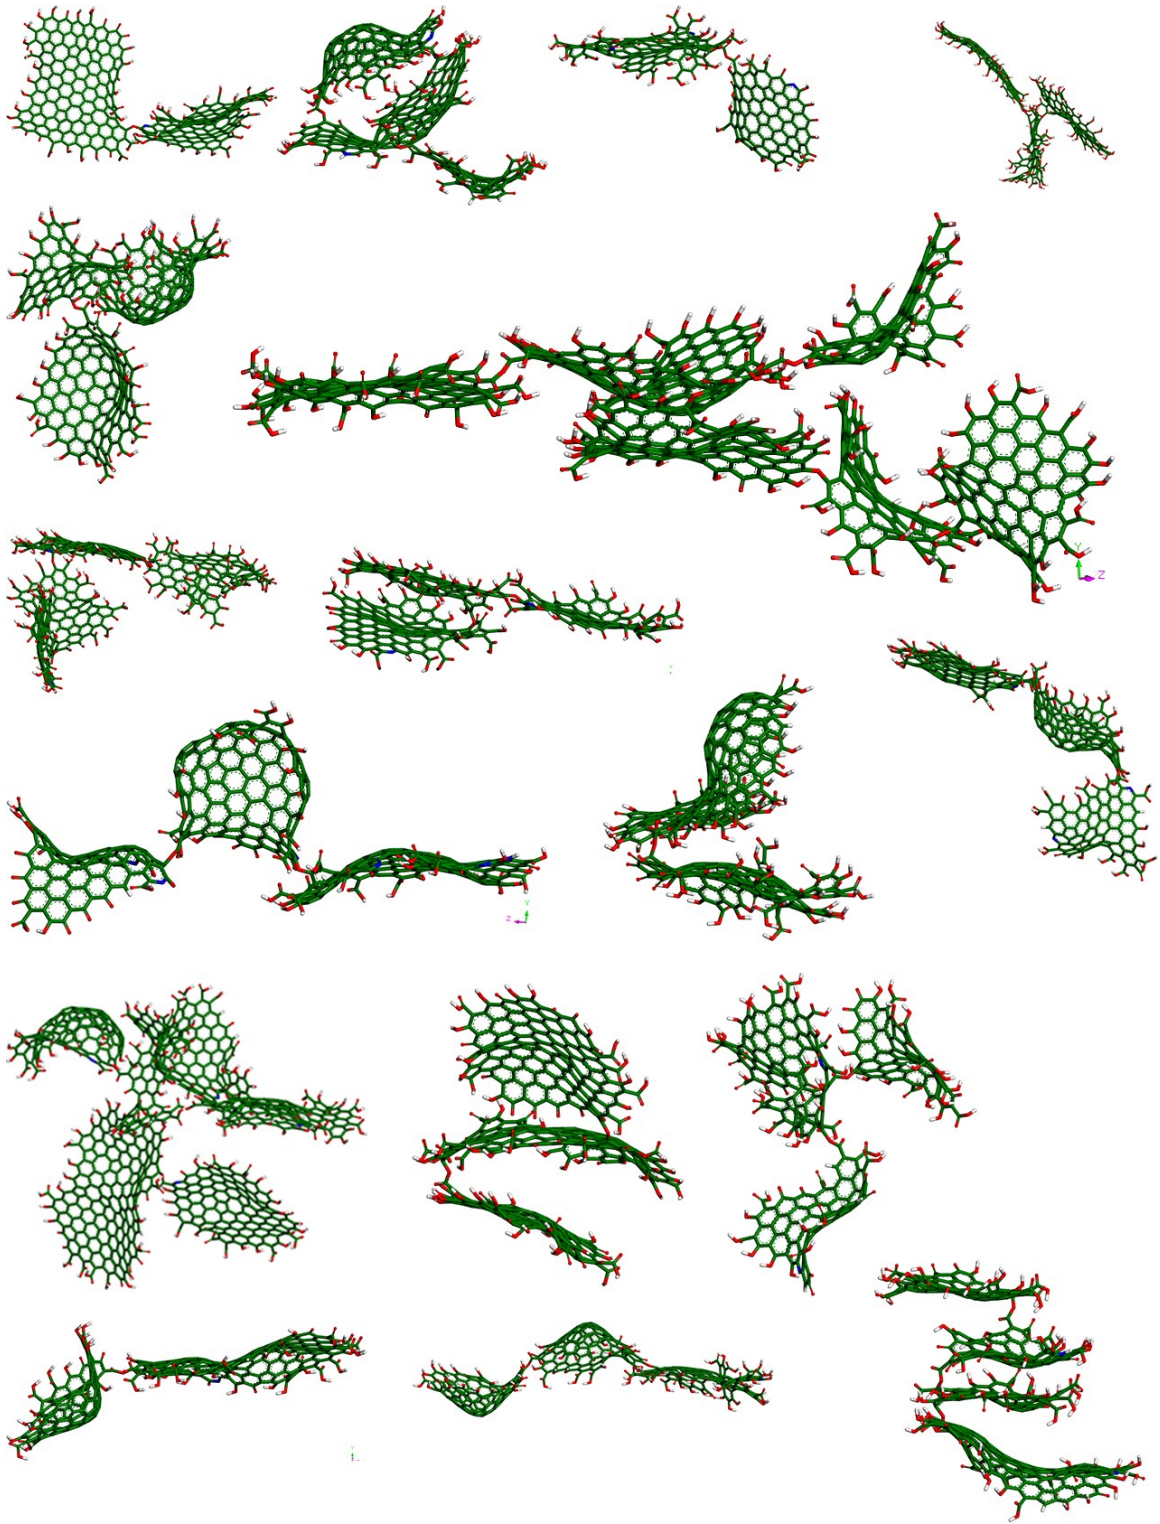



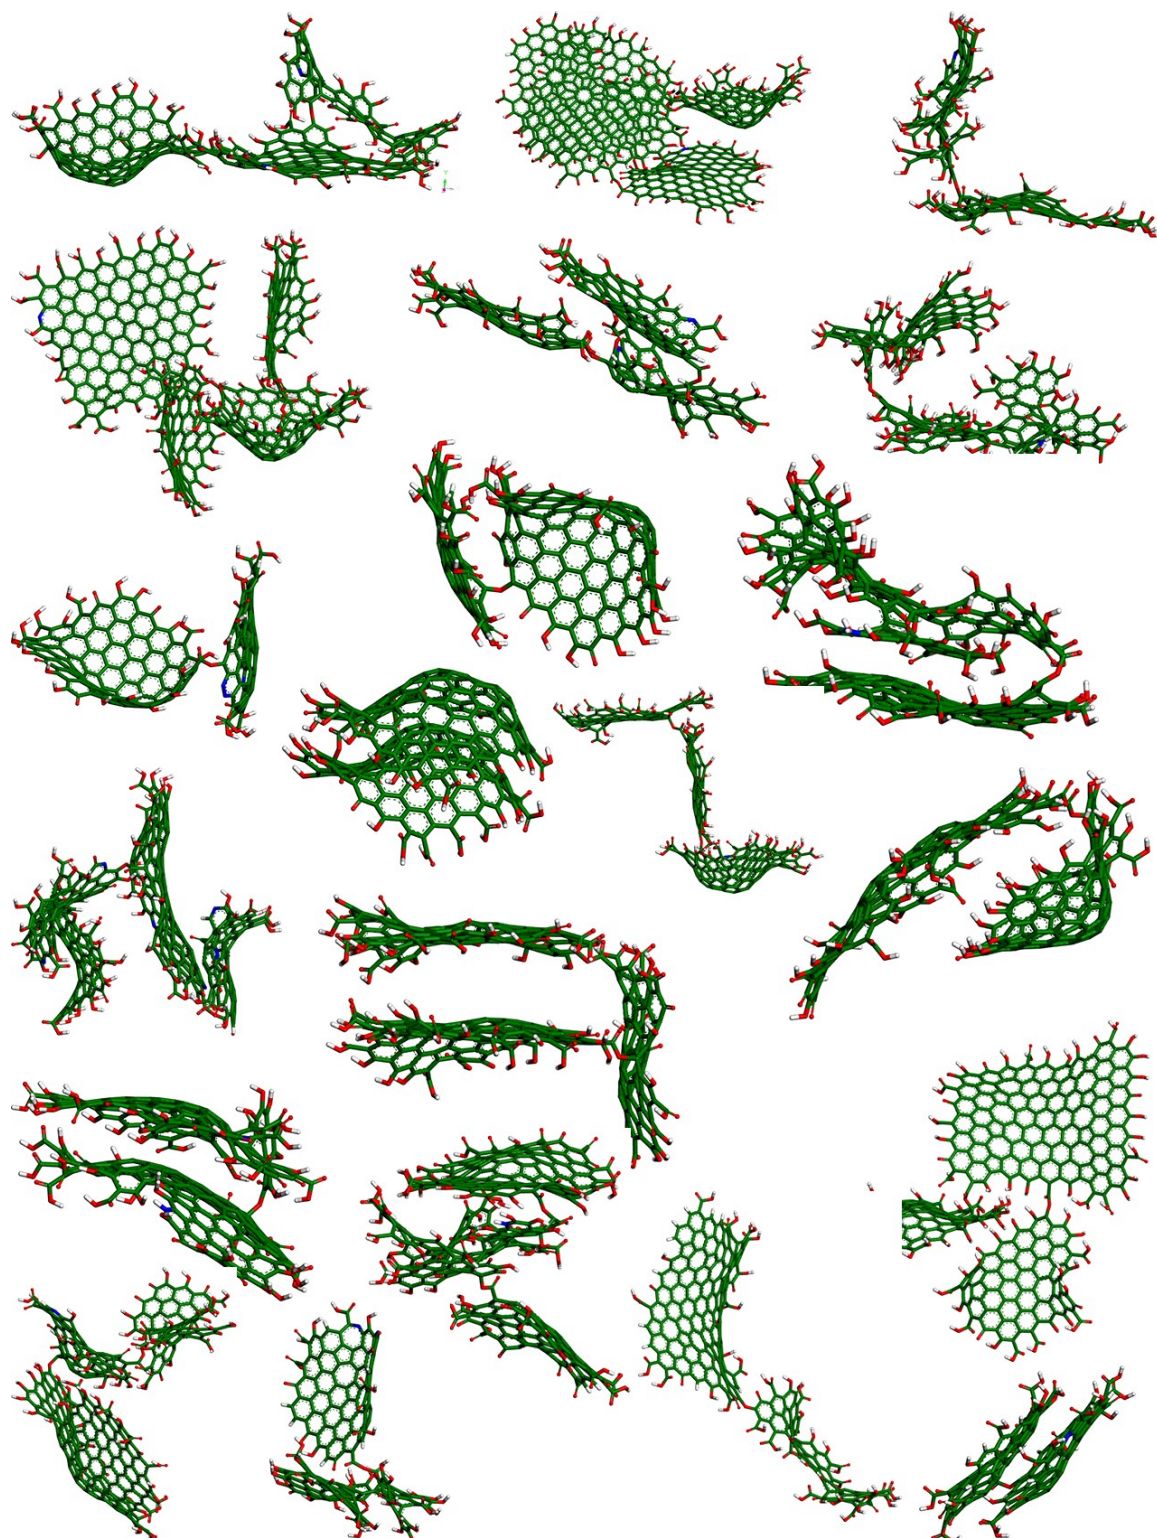

**Microporous model 1**

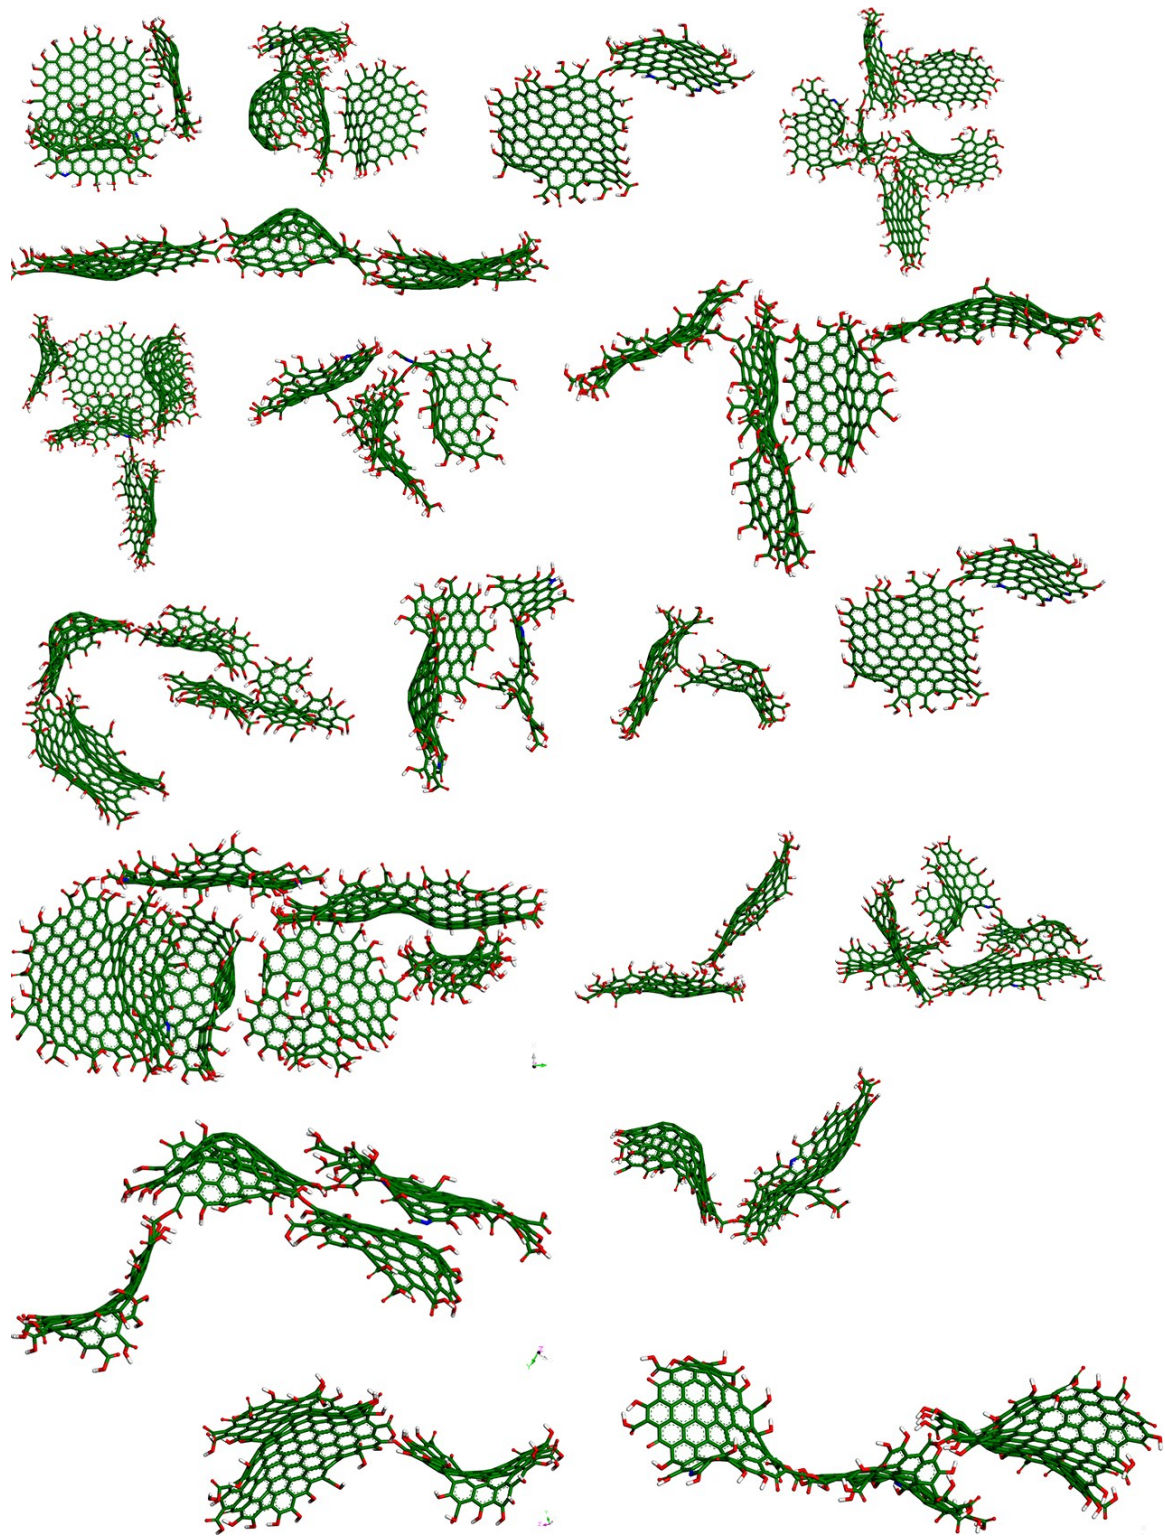



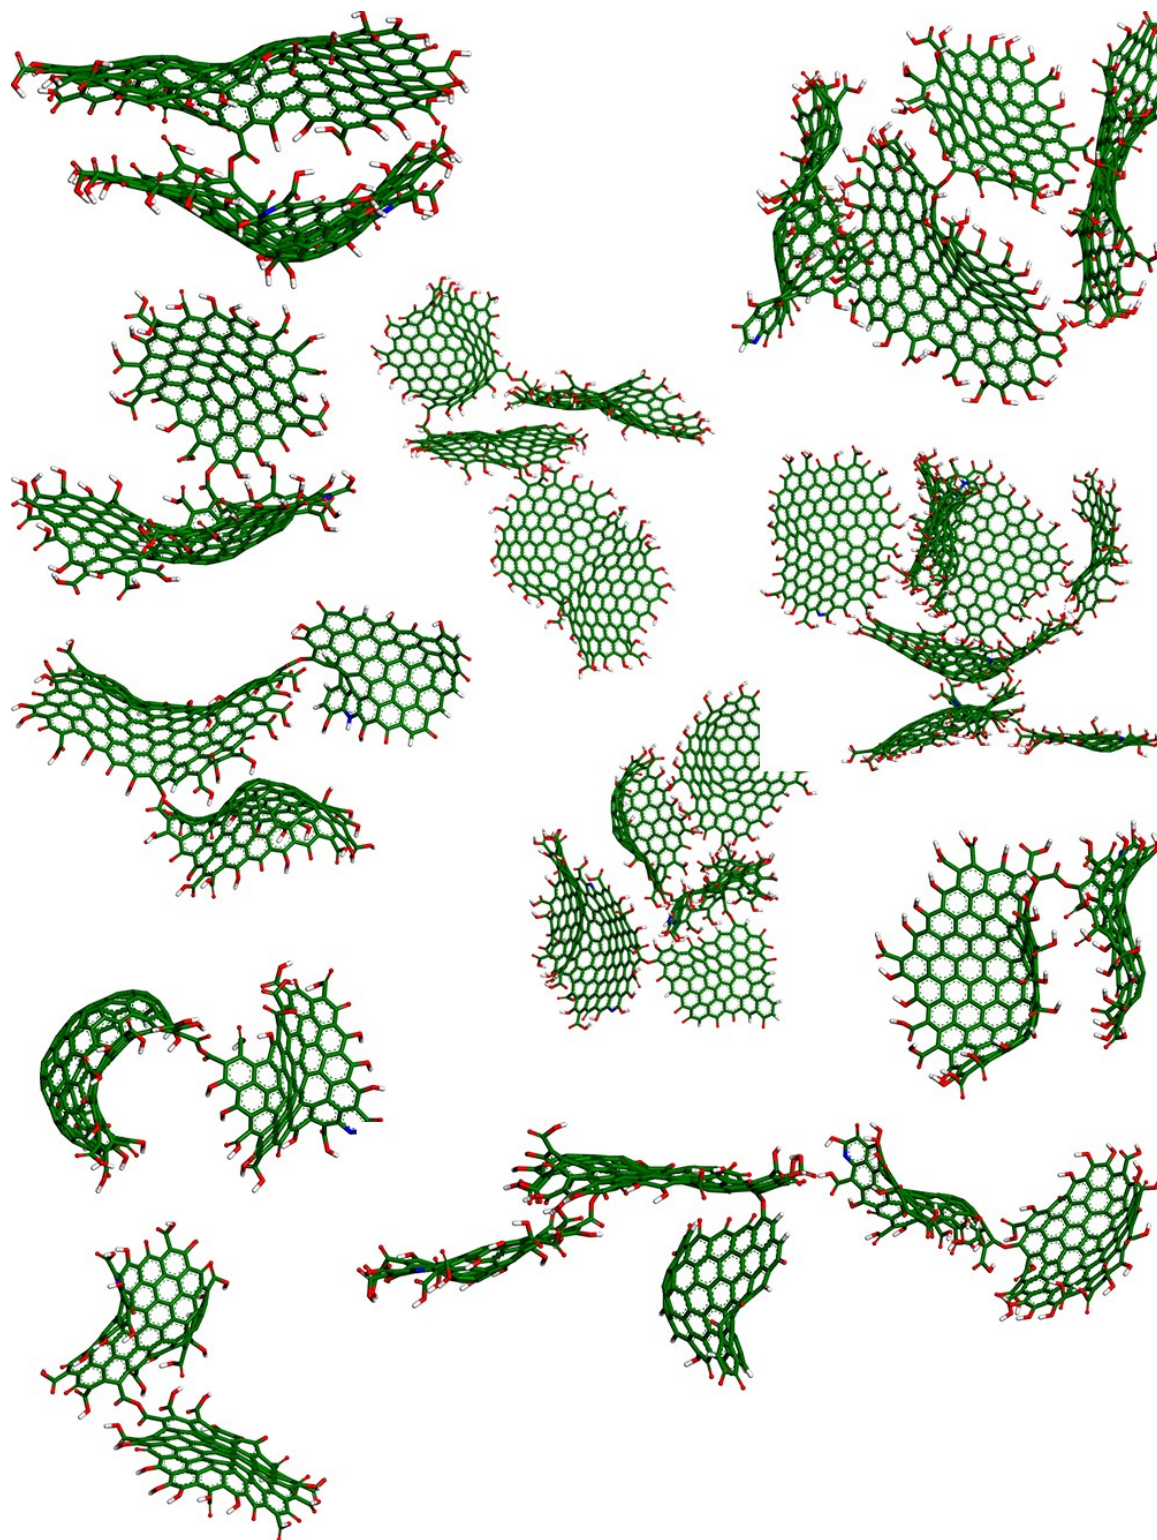

Micro/mesoporous model 2

## Reference

- 1 Louw E. Structure and combustion reactivity of inertinite-rich and vitrinite-rich South African coal chars: Quantification of the structural factors contributing to reactivity differences: University Park PA USA, Penn State Univ, PhD thesis; 2014.
- 2 Marcano FC. Improved Generation of Large-scale Atomistic Representations and Pyrolysis/combustion Simulations of Illinois Coal and Coal Char Using the Reaxff Reactive Force Field: Pennsylvania State University; 2012.
- 3 Vander Wal R, Tomasek AJ, Pamphlet MI, Taylor CD, Thompson WK. Analysis of HRTEM images for carbon nanostructure quantification. *Journal of Nanoparticle Research*. 2004;6(6):555-68.
- 4 Sharma A, Kyotani T, Tomita A. A new quantitative approach for microstructural analysis of coal char using HRTEM images. *Fuel*. 1999;78(10):1203-12.
- 5 Sharma A, Kyotani T, Tomita A. Quantitative evaluation of structural transformations in raw coals on heat-treatment using HRTEM technique. *Fuel*. 2001;80(10):1467-73.
- 6 Sing KSW. Reporting physisorption data for gas/solid systems with special reference to the determination of surface area and porosity (Recommendations 1984). *Pure & Applied Chemistry*. 1985;57(4):603-19.
- 7 Chiang YC, Chiang PC, Huang CP. Effects of pore structure and temperature on VOC adsorption on activated carbon. *Carbon*. 2001;39(4):523-34.
